## SP5.1.3

## Analysis of National Bariatric Surgery Related Clinical Incidents: Lessons Learned and a Proposed Safety Checklist for Bariatric Surgery

Islam Omar<sup>1</sup>, Brijesh Madhok<sup>2</sup>, Chetan Parmar<sup>3</sup>, Omar Khan<sup>4</sup>, Michael Wilson<sup>5</sup>, Kamal Mahawar<sup>1</sup>

<sup>1</sup>Bariatric Unit, Department of General Surgery, Sunderland Royal Hospital, South Tyneside and Sunderland NHS Trust, Sunderland, United Kingdom, <sup>2</sup>Royal Derby Hospital, University Hospitals of Derby & Burton NHS Foundation Trust, <sup>3</sup>Whittington Health NHS Trust, <sup>4</sup>St. George's University Hospitals NHS Foundation Trust, <sup>5</sup>NHS Forth Valley

**Background:** Hundreds of thousands of patient-safety clinical incidents are reported to the National Reporting and Learning System (NRLS) database in the UK every year. The purpose of this study was to identify bariatric surgery-related learning points from these incidents.

**Methods:** We analyzed bariatric surgery-related clinical incidents reported to the UK NRLS database between 01 April 2005 and 31<sup>st</sup> October 2020. The authors used their experience to identify learning themes and design a safety checklist.

**Results:** We identified 541 bariatric surgery-related clinical incidents in 58 different themes. Preoperative incidents represented 30.3% (N = 164), intraoperative 38.1% (N = 206), and postoperative accounted for 31.6% (N = 171). In terms of severity of incidents, (150;27.7%) were of high severity, whereas medium and low severity incidents were (244;45.1%) and (147;27.2%) respectively.

The most commonly reported high severity theme was failure of thromboprophylaxis (50;9.2%). Intraoperative high severity incidents included 17 incidents of stapling of orogastric/nasogastric tubes or temperature probes, 8 missed needles, 8 broken graspers, and 6 incidents of band parts left behind. Postoperatively, the most commonly reported high severity theme was improper management of diabetes mellitus (35;6.5%).

Medications errors represented a significant proportion of the medium severity incidents and included (26;4.8%) incidents of improper or missed prescription of routine medications and anticoagulants preoperatively and (45;8.3%) wrong prescriptions, dosage or prescribing of contraindicated medications postoperatively.

**Conclusion:** We identified 58 specific themes of bariatric surgery-related clinical incidents. We proposed specific recommendations for each incidents theme in addition to a bariatric safety checklist to help improve the safety of bariatric surgery worldwide.
